# Supplementary material
Source: PubMed Central journal article supplement (PMC5419860)
Supplement: NIHMS851718-supplement-1.pdf [file NIHMS851718-supplement-1.pdf]

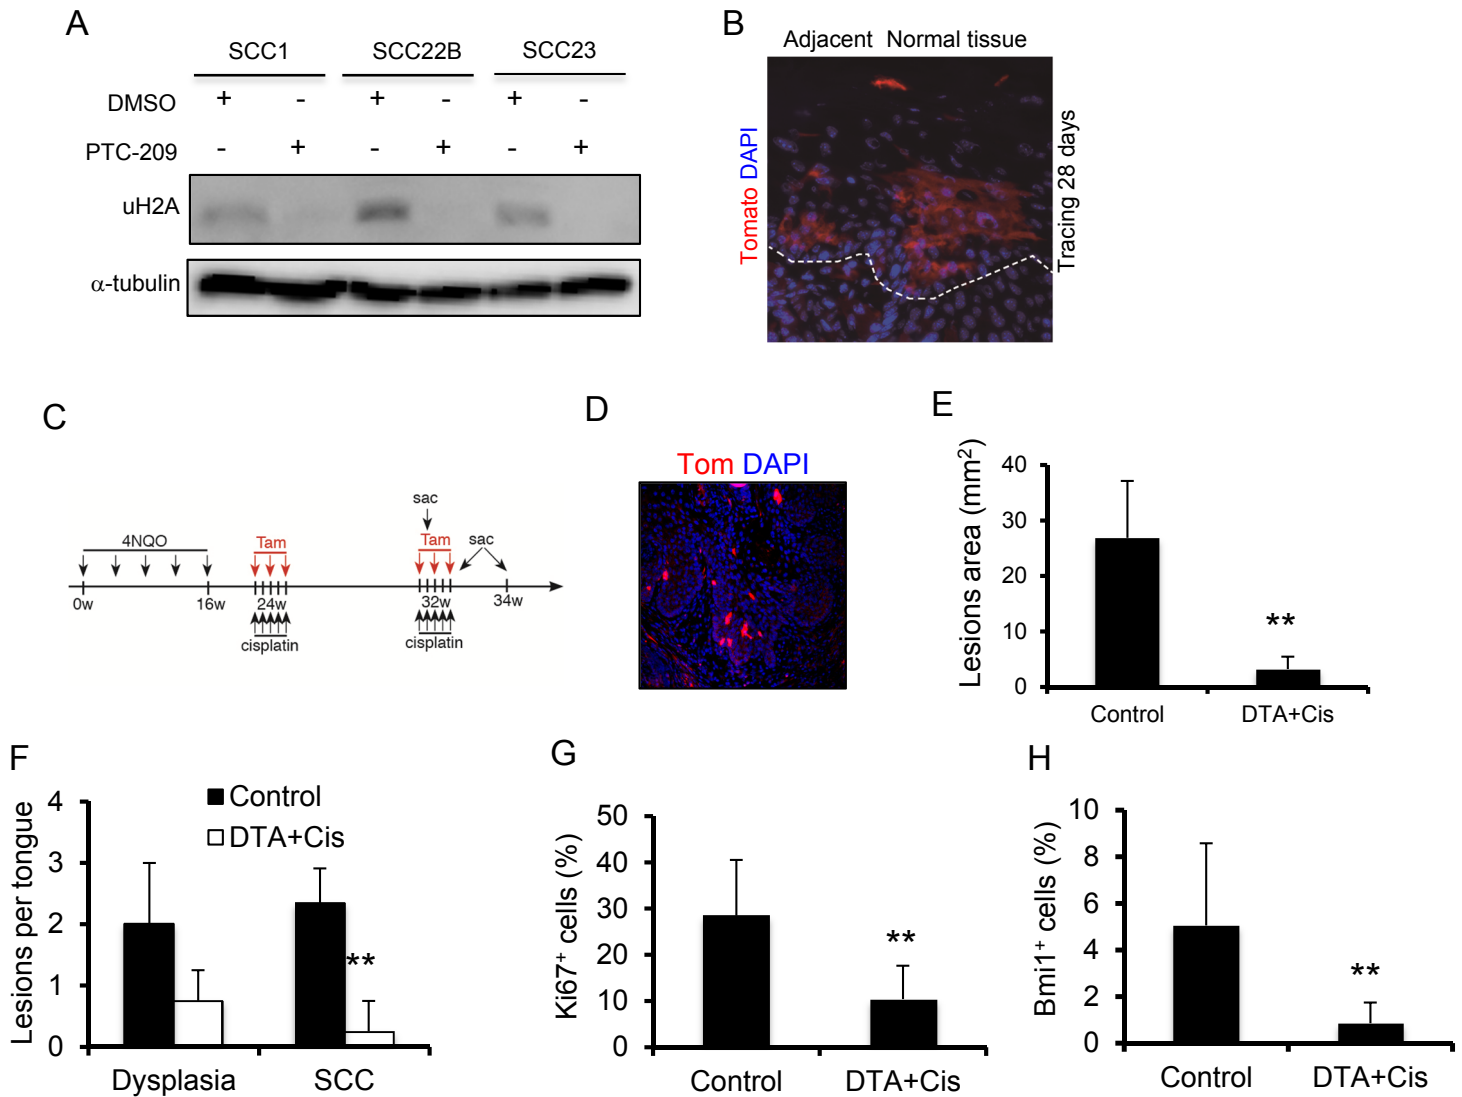

**Figure S1, related to Figure 4, The combination of cisplatin and ablating *Bmi1*<sup>+</sup> CSCs potently inhibits recurrent HNSCC tumor growth.**

(A) PTC-209 suppressed the ubiquitination of histone H2A in HNSCC cells by inhibiting BMI1 activity.

(B) Lineage tracing showed that PTC-209 did not affect adjacent normal epithelial tissues.

(C) Experimental design for examining tumor cells in recurrent HNSCC after ablating *Bmi1*<sup>+</sup> CSCs and cisplatin treatment. *Bmi1*<sup>CreER</sup>;*R26*<sup>DTA</sup> or *Bmi1*<sup>CreER</sup>;*R26*<sup>tdTomato</sup>;*R26*<sup>DTA</sup> mice after first round of cisplatin and tamoxifen treatment were maintained for 8 additional weeks. Mice with recurrent HNSCC lesion received second round of treatment and tumors were harvested after 1 or 14 days.

(D) Tomato labeling showed *Bmi1*<sup>+</sup> CSCs in recurrent HNSCC of mice.

(E) Quantification of recurred lesion areas visible in the tongue 14 days after control (n=3) or cisplatin and ablating *Bmi1*<sup>+</sup> CSCs (n=4). Values are mean  $\pm$  SD. \*\*p < 0.01; Student's t-test.

(F) Quantification of dysplasia and SCC numbers after control (n=3) or cisplatin and ablating *Bmi1*<sup>+</sup> CSCs (n=4). Values are mean  $\pm$  SD. \*\*p < 0.01; Student's t-test.

(G) Percentage of Ki67<sup>+</sup> cells in recurrent HNSCC of mice 14 days after control or cisplatin and ablating *Bmi1*<sup>+</sup> CSCs. Values are mean  $\pm$  SD. \*\*p < 0.01; Student's t-test.

(H) Percentage of *Bmi1*<sup>+</sup> cells in recurrent HNSCC of mice 14 days after control or cisplatin and ablating *Bmi1*<sup>+</sup> CSCs. Values are mean  $\pm$  SD. \*\*p < 0.01; Student's t-test.

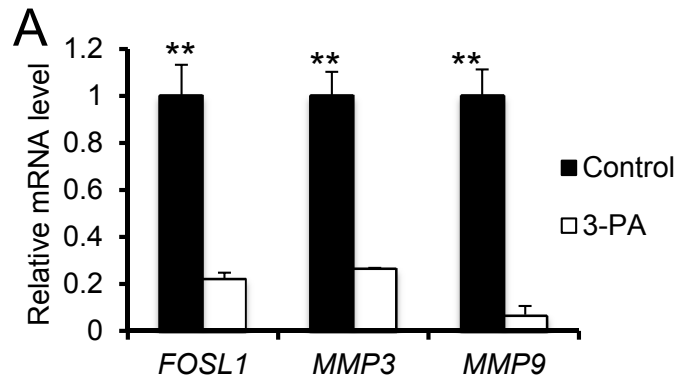

**Figure S2, related to Figure 6, 3-PA potently inhibits AP-1 activities in Bmi1<sup>+</sup> CSCs by Real-time RT-PCR.** Data represent mean  $\pm$  SD from one of three independent experiments. \*\* $p < 0.01$ ; Student's t test;  $n = 3$

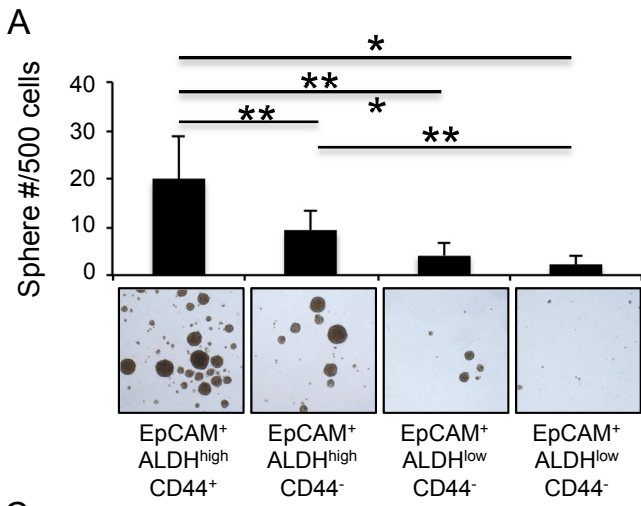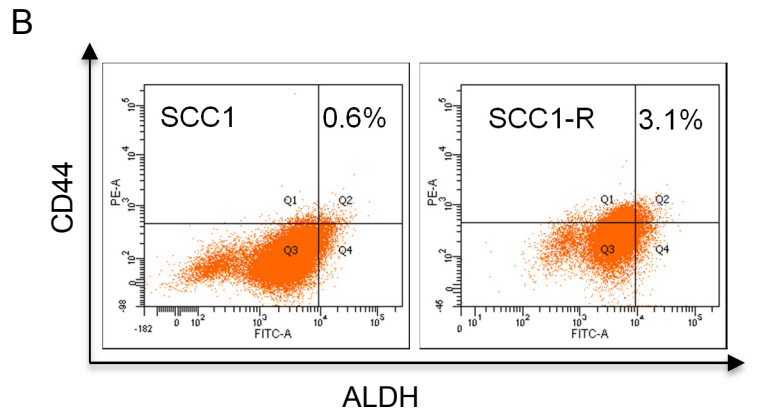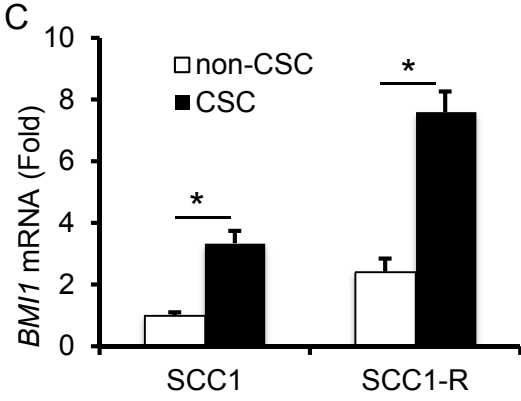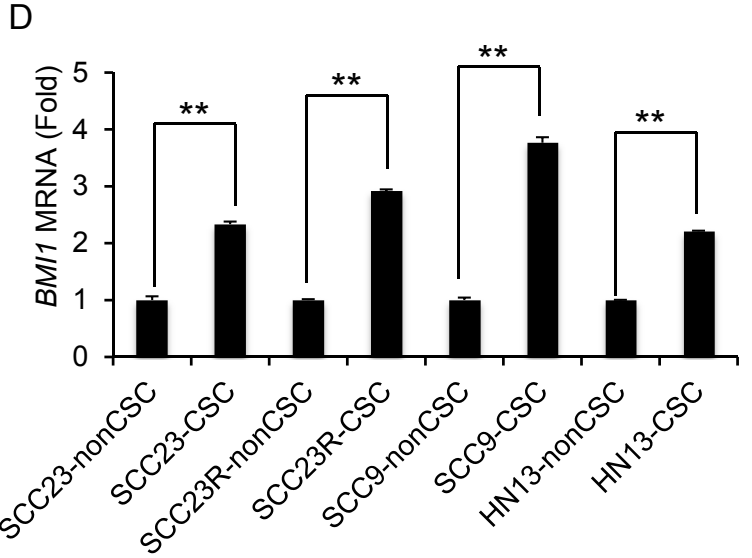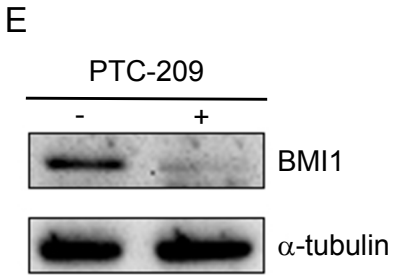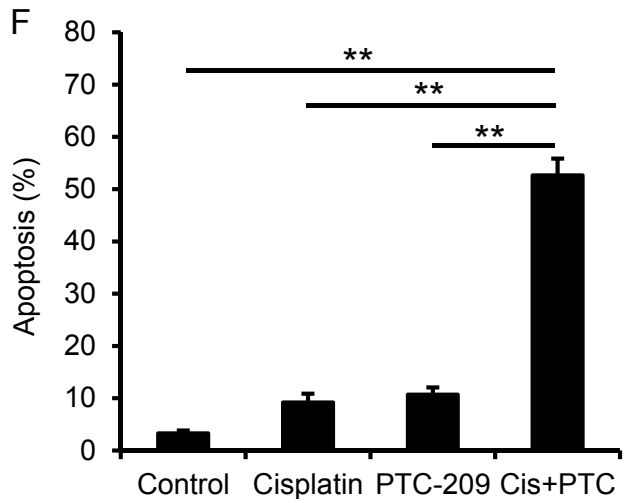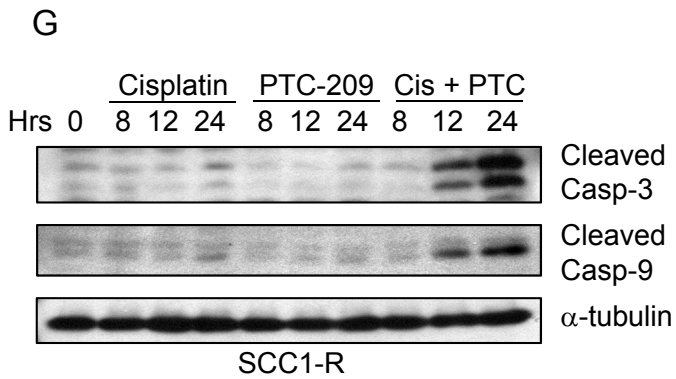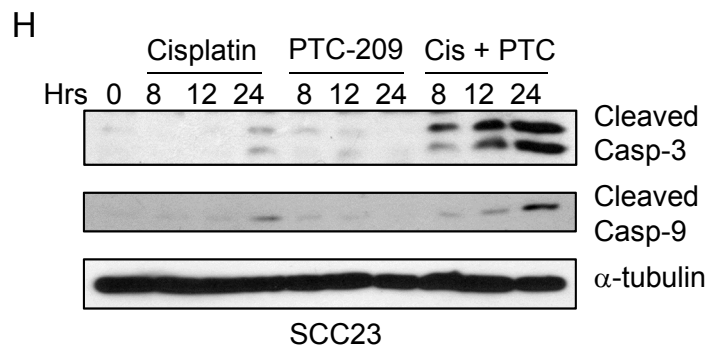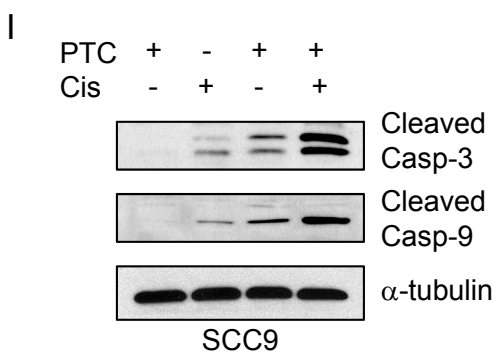

**Figure S3, related to Figure 7, Inhibition of Bmi1<sup>+</sup> by PTC-209 renders HNSCC cell lines sensitive to cisplatin.**

- (A) ALDH<sup>high</sup>/CD44<sup>+</sup> cells isolated from primary HNSCC tissues potently formed tumorspheres in vitro compared to ALDH<sup>high</sup>/CD44<sup>-</sup>, ALDH<sup>low</sup>/CD44<sup>+</sup> and ALDH<sup>low</sup>/CD44<sup>-</sup> cells.
- (B) FACS sorting showed increasing proportion of ALDH<sup>high</sup>CD44<sup>+</sup> cells in SCC1R cells compared to parental SCC1 cells.
- (C) qRT-PCR showed that Bmi1 was significantly up-regulated in CSCs in both SCC1 and SCC1R cell lines. Data represent mean  $\pm$  SD from one of three independent experiments. \* $p < 0.05$ ; Student's t test;  $n = 3$ .
- (D) Bmi1 expression was elevated in CSCs populations from different HNSCC cell lines. Data represent mean  $\pm$  SD from one of three independent experiments. \*\* $p < 0.01$ ; Student's t test;  $n = 3$ .
- (E) Western blot analysis showed that PTC-209 treatment reduced BMI1 proteins in SCC1R cells.
- (F) PTC-209 sensitized SCC1R cells to cisplatin killing. Data represent mean  $\pm$  SD from one of three independent experiments. \*\* $p < 0.01$ ; One-way ANOVA;  $n = 3$ .
- (G) PTC-209 enhanced cisplatin-induced caspase activation in SCC1R cells.
- (H) PTC-209 enhanced cisplatin-induced caspase activation in SCC23 cells.
- (I) PTC-209 enhanced cisplatin-induced caspase activation in SCC9 cells.

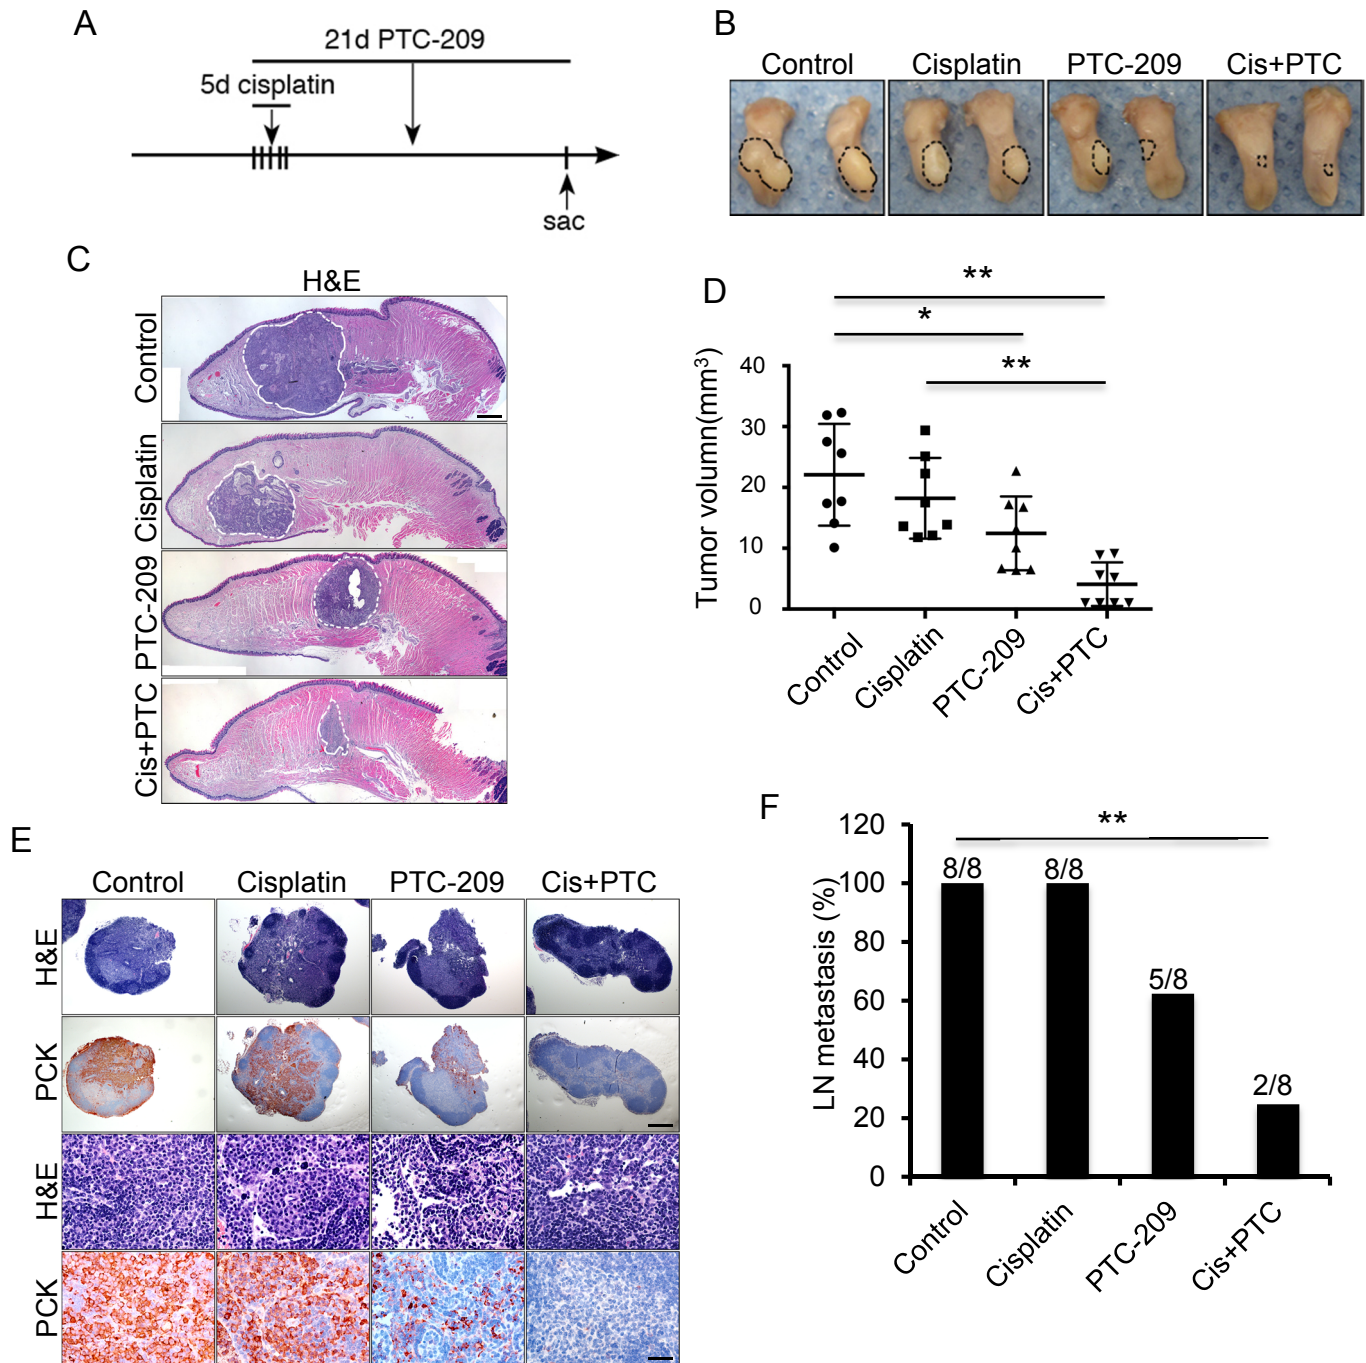

**Figure S4, related to Figure 7, Inhibition of BMI1 by PTC-209 impairs tumorigenic and chemoresistant properties of ALDH<sup>high</sup>CD44<sup>+</sup> CSC-like cells from a cisplatin-resistant human HNSCC cell line.**

(A) Experimental design for SCC1R tumor treatment *in vivo*.

(B) Representative image of HNSCC tumors from ALDH<sup>high</sup>CD44<sup>+</sup> CSCs after treatment. Cis+PTC, cisplatin plus PTC-209.

(C) Histologic staining of human HNSCC tumors in nude mice after treatment. Scale bar, 250  $\mu$ m. Cis+PTC, cisplatin plus PTC-209.

(D) Quantification of human HNSCC tumor growth in nude mice after treatment. Values are mean  $\pm$  SD. \* $p < 0.05$ ; one-way ANOVA;  $n = 8$ .

(E) Representative staining of metastatic tumor cells in cervical lymph nodes of nude mice after treatment using anti-pan-cytokeratin (PCK). Scale bar upper, 250  $\mu$ m; Scale bar lower, 50  $\mu$ m.

(F) The percentage of mice having lymph node metastasis in nude mice after treatment. \* $p < 0.05$ ; Fisher exact test;  $n = 8$ . Cis+PTC, cisplatin plus PTC-209.

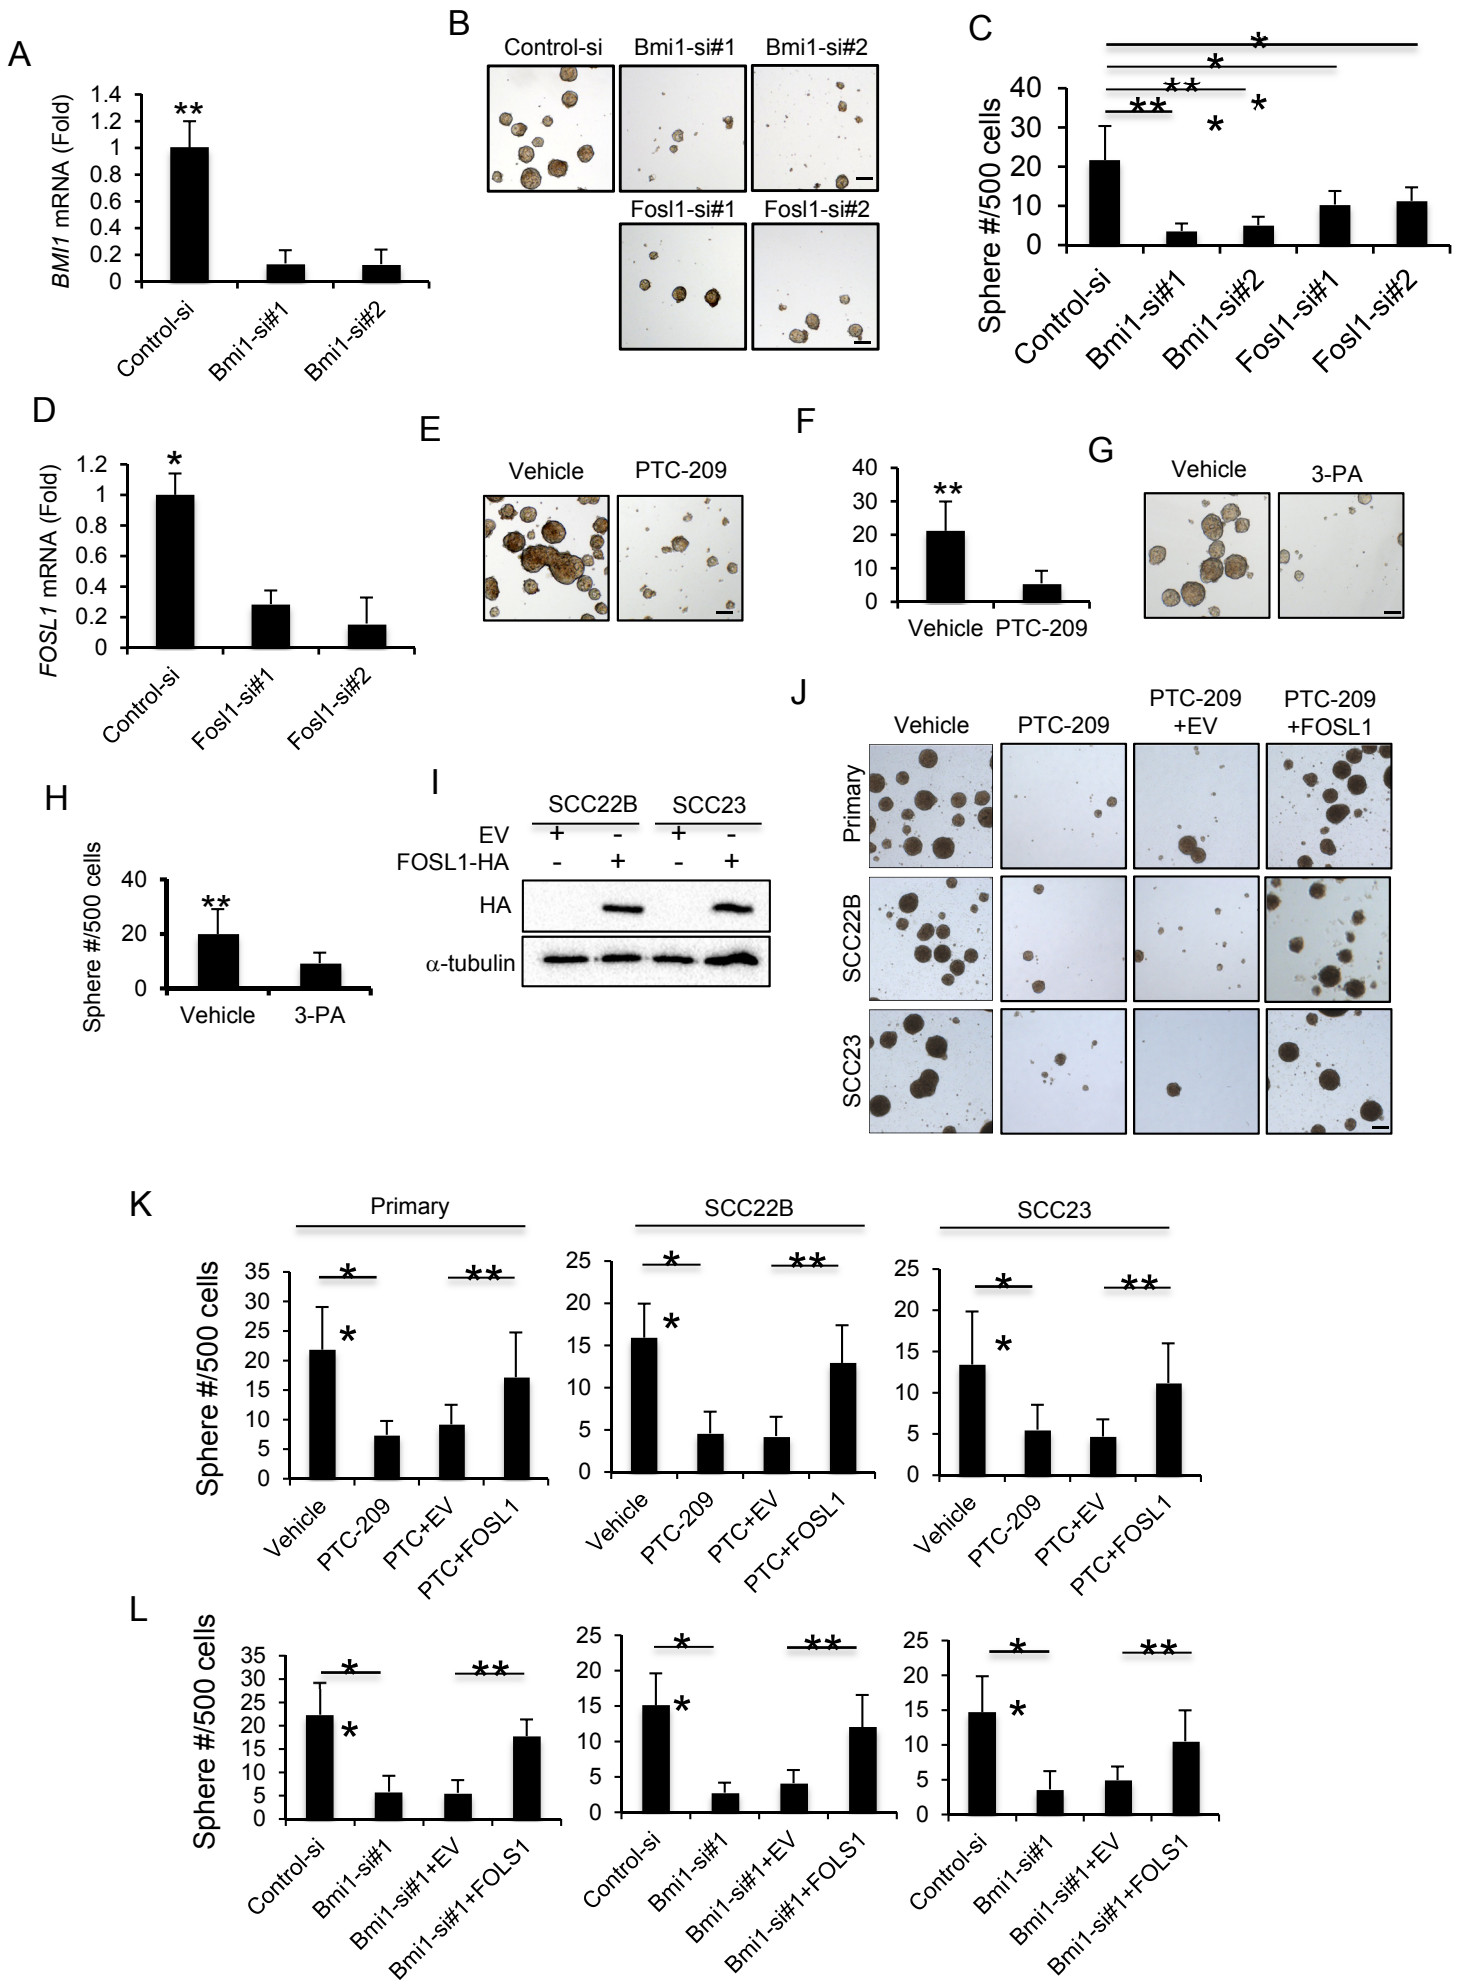

**Figure S5, related to Figure 7, Targeting BMI1 or AP-1 impairs tumor sphere formation of human CSCs in vitro.**

(A) Real-time RT-PCR showed that *BMI1* mRNA from human CSCs was knocked down by two different *BMI1* siRNAs. Data represent mean  $\pm$  SD from one of three independent experiments. \*\* $p < 0.01$ ; Student's t test;  $n = 3$ .

(B) Representative images of tumor sphere formation by *BMI1* and *FOSL1* knockdown human CSCs.

(C) Quantification of tumor sphere formation of human CSCs after knockdown of *BMI1* or *FOSL1*. Values are mean  $\pm$  SD from one of three independent experiments. \* $p < 0.05$ ; \*\* $p < 0.01$ ; one-way ANOVA;  $n = 12$ .

(D) Real-time RT-PCR confirmed that *FOSL1* mRNA from human CSCs was knocked down by two different *FOSL1* siRNAs. Data represent mean  $\pm$  SD from one of three independent experiments. \*\* $p < 0.01$ ; Student's t test;  $n = 3$ .

(E and F) PTC-209 treatment inhibited tumorsphere formation of human CSCs. Data represent mean  $\pm$  SD from one of three independent experiments. \*\* $p < 0.01$ ; Student's t test;  $n = 3$ .

(G and H) 3-PA treatment inhibited tumor sphere formation of human CSCs. Data represent mean  $\pm$  SD from one of three independent experiments. \*\* $p < 0.01$ ; Student's t test;  $n = 3$ .

(I) The ectopic expression of HA-FOSL1 in HNSCC cells was determined by Western blot.

(J and K) The ectopic expression of FOSL1 rescued tumorsphere formation inhibited by PTC-209. Data represent mean  $\pm$  SD from one of three independent experiments. \* $p < 0.05$ , \*\* $p < 0.01$ ; Student's t test;  $n = 3$ .

(L) The ectopic expression of FOSL1 rescued tumorsphere formation inhibited by *Bmi1* knockdown. Data represent mean  $\pm$  SD from one of three independent experiments. \*\* $p < 0.01$ ; Student's t test;  $n = 3$ .



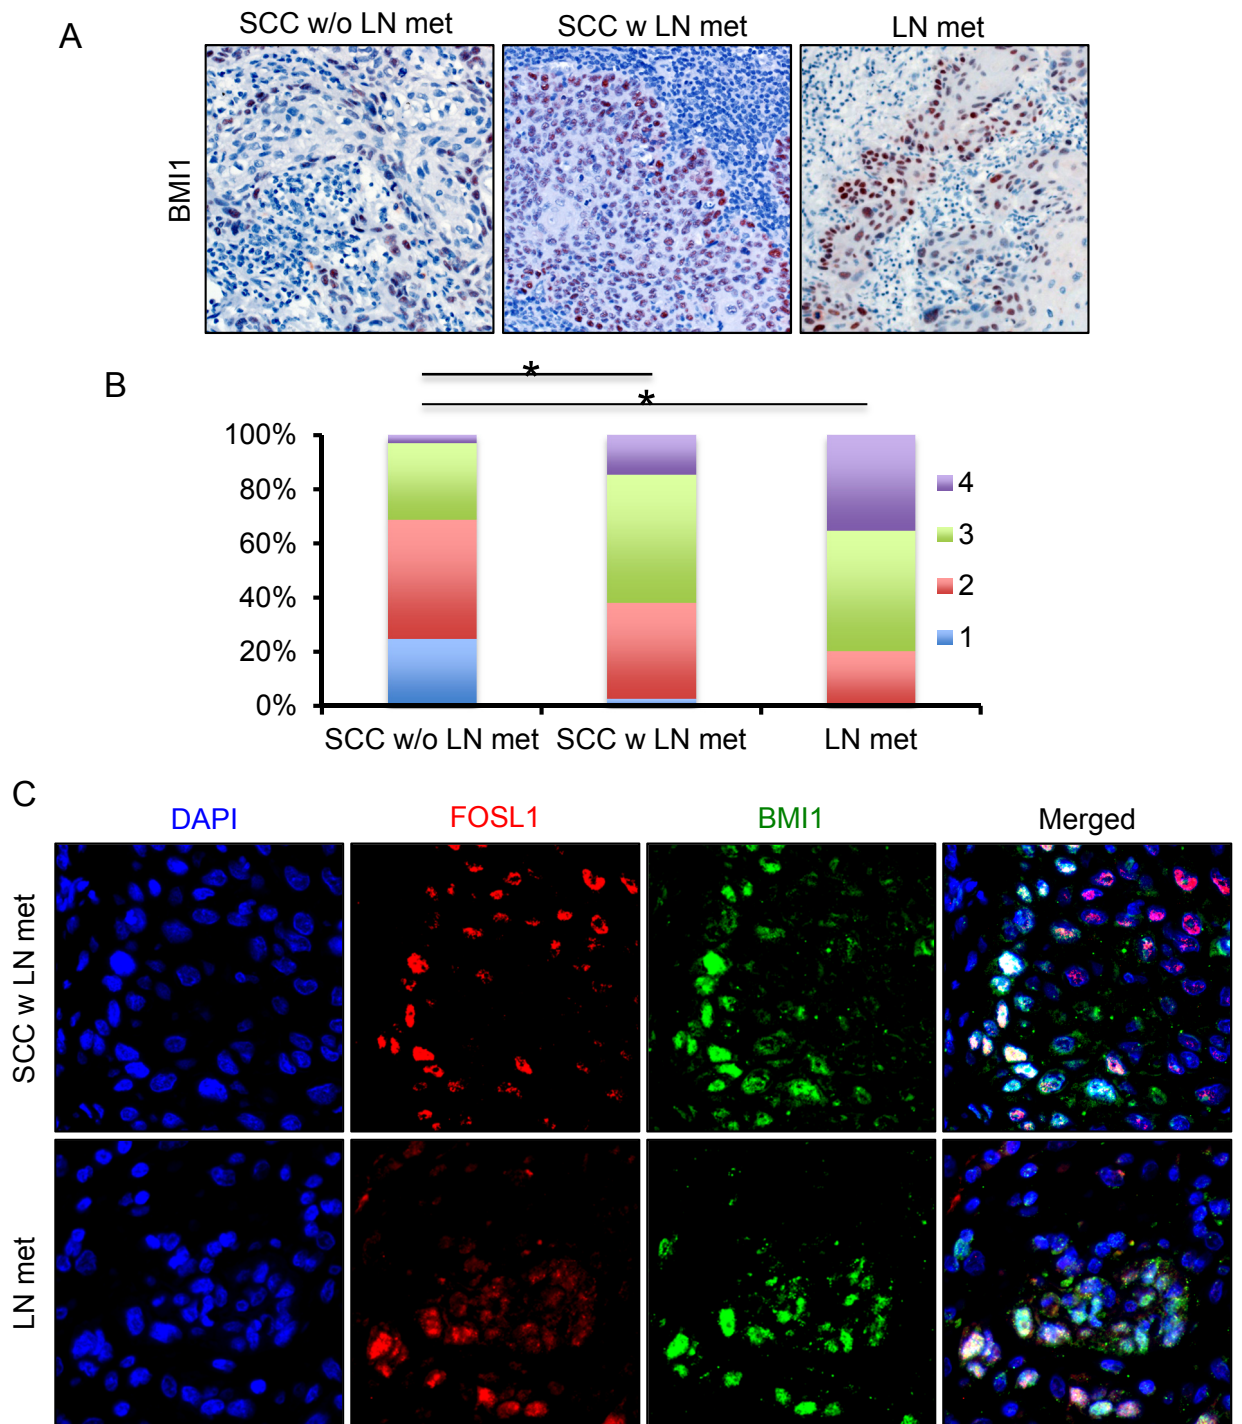

**Figure S6, related to Figure 7, BMI1 is highly abundant in human SCC lymph node metastasis and co-expressed with FOLS1.**

(A) Immunostaining of BMI1 expression in human HNSCC specimens without LN metastasis (SCC w/o LN met), HNSCC with lymph node metastases (SCC w LN met) and lymph node metastases (LN met). Images are representative of 31 (SCC w/o LN met), 33 (SCC w LN met), and 33 (LN) samples.

(B) Quantification of BMI1 abundance in SCC w/o LN met, SCC w LN met and lymph node metastases (LN met). BMI1 staining intensity was scored as: 1 = weak; 2 = moderate; 3 = strong staining and 4 = very strong.

(C) Co-immunostaining for FOSL1 (red) and BMI1 (green) in HNSCC with lymph node metastases (SCC w LN met) and lymph node metastases (LN met).



**Table S1, related to Figure 6. Differential expressed genes between Tomato<sup>+</sup> and Tomato<sup>-</sup> tumor cells.**

**Table S2, related to Figure 7, BMI1 is positively correlated with the levels of FOSL1 in HNSCC by Pearson correlation analysis (r = 0.796, p < 0.01).**

**Table S2, related to Figure 7, The abundance of BMI1 correlates with the abundance of FOSL1 in human HNSCC**

|                    |   | FOSL1 expression |   |    |    |
|--------------------|---|------------------|---|----|----|
|                    |   | 1                | 2 | 3  | 4  |
| BMI1<br>expression | 1 | 0                | 9 | 0  | 0  |
|                    | 2 | 0                | 7 | 26 | 0  |
|                    | 3 | 0                | 0 | 27 | 13 |
|                    | 4 | 0                | 0 | 0  | 15 |

The staining intensity was scored as: 1, weaker staining; 2, modest staining; 3, strong staining; and 4 very strong staining. r=0.7960; p<0.01
